# Supplementary material for: Azole-Resistance in Aspergillus terreus and Related Species: An Emerging Problem or a Rare Phenomenon?
Source: PubMed Central journal article supplement (PMC5882871; doi:10.3389/fmicb.2018.00516), 2018-03-28
Supplement: DataSheet1.pdf [file DataSheet1.pdf]

## Supplementary Material

### Azole-resistance in *Aspergillus* section *Terrei* an emerging problem or a rare phenomenon?

Tamara Zoran et al.

Supplementary Table S1. Investigated isolates in study

| Strain | Species                         | Origin | Specimen | First-line Therapy | Susceptibility testing |
|--------|---------------------------------|--------|----------|--------------------|------------------------|
| 1      | <i>A. terreus sensu stricto</i> | Italy  | BAL      | No data            | ETest®                 |
| 2      | <i>A. terreus sensu stricto</i> | Italy  | BAL      | No data            | ETest®                 |
| 3      | <i>A. citrinoterreus</i>        | Italy  | Toenail  | No                 | ETest®                 |
| 4      | <i>A. terreus sensu stricto</i> | Italy  | Toenail  | No                 | ETest®                 |
| 5      | <i>A. terreus sensu stricto</i> | Italy  | Toenail  | No                 | ETest®                 |
| 6      | <i>A. terreus sensu stricto</i> | Italy  | Toenail  | No                 | ETest®                 |
| 7      | <i>A. terreus sensu stricto</i> | Italy  | Toenail  | No                 | ETest®                 |
| 8      | <i>A. terreus sensu stricto</i> | Italy  | Toenail  | No                 | ETest®                 |
| 9      | <i>A. terreus sensu stricto</i> | Italy  | Toenail  | No                 | ETest®                 |
| 10     | <i>A. terreus</i>               | Italy  | Toenail  | No                 | ETest®                 |

| <i>sensu stricto</i> |                                 |         |             |              |  |        |
|----------------------|---------------------------------|---------|-------------|--------------|--|--------|
| <b>11</b>            | <i>A. terreus sensu stricto</i> | Italy   | Fingernails | No           |  | ETest® |
| <b>12</b>            | <i>A. terreus sensu stricto</i> | Austria | Sputum      | No           |  | ETest® |
| <b>13</b>            | <i>A. terreus sensu stricto</i> | Austria | Sputum      | Micafungin   |  | ETest® |
| <b>14</b>            | <i>A. terreus sensu stricto</i> | Austria | Sputum      | No           |  | ETest® |
| <b>15</b>            | <i>A. terreus sensu stricto</i> | Austria | Sputum      | No           |  | ETest® |
| <b>16</b>            | <i>A. terreus sensu stricto</i> | Austria | Sputum      | No           |  | ETest® |
| <b>17</b>            | <i>A. terreus sensu stricto</i> | Austria | No data     | No data      |  | ETest® |
| <b>18</b>            | <i>A. terreus sensu stricto</i> | Austria | BAL         | No           |  | ETest® |
| <b>19</b>            | <i>A. terreus sensu stricto</i> | Austria | Sputum      | No           |  | ETest® |
| <b>20</b>            | <i>A. terreus sensu stricto</i> | Austria | BAL         | Voriconazole |  | ETest® |
| <b>21</b>            | <i>Potential new species</i>    | Italy   | Biopsy      | Voriconazole |  | ETest® |
| <b>22</b>            | <i>A. hortai</i>                | Italy   | Sputum      | Voriconazole |  | ETest® |
| <b>23</b>            | <i>A. terreus sensu stricto</i> | Austria | Swab        | No           |  | ETest® |
| <b>24</b>            | <i>A. terreus sensu stricto</i> | Austria | Sputum      | No           |  | ETest® |
| <b>25</b>            | <i>A. terreus</i>               | Austria | Sputum      | No           |  | ETest® |

| <i>sensu stricto</i> |                                 |         |        |             |        |
|----------------------|---------------------------------|---------|--------|-------------|--------|
| <b>26</b>            | <i>A. terreus sensu stricto</i> | Germany | Sputum | No data     | ETest® |
| <b>27</b>            | <i>A. citrinoterreus</i>        | Germany | BAL    | Caspofungin | ETest® |
| <b>28</b>            | <i>A. terreus sensu stricto</i> | Germany | BAL    | Caspofungin | ETest® |
| <b>29</b>            | <i>A. terreus sensu stricto</i> | Germany | BAL    | No data     | ETest® |
| <b>30</b>            | <i>A. terreus sensu stricto</i> | Germany | Sputum | No data     | ETest® |
| <b>31</b>            | <i>A. terreus sensu stricto</i> | Germany | Sputum | No data     | ETest® |
| <b>32</b>            | <i>A. terreus sensu stricto</i> | Germany | Sputum | No data     | ETest® |
| <b>33</b>            | <i>A. terreus sensu stricto</i> | Germany | Sputum | No data     | ETest® |
| <b>34</b>            | <i>A. terreus sensu stricto</i> | Germany | Sputum | No data     | ETest® |
| <b>35</b>            | <i>A. terreus sensu stricto</i> | Germany | Sputum | No data     | ETest® |
| <b>36</b>            | <i>A. terreus sensu stricto</i> | Germany | Sputum | No data     | ETest® |
| <b>37</b>            | <i>A. terreus sensu stricto</i> | Germany | Sputum | No data     | ETest® |
| <b>38</b>            | <i>A. terreus sensu stricto</i> | Germany | Sputum | No data     | ETest® |
| <b>39</b>            | <i>A. terreus sensu stricto</i> | Germany | Sputum | No data     | ETest® |
| <b>40</b>            | <i>A. terreus</i>               | Germany | Sputum | No data     | ETest® |

| <i>sensu stricto</i> |                                 |         |                     |              |  |        |
|----------------------|---------------------------------|---------|---------------------|--------------|--|--------|
| 41                   | <i>A. terreus sensu stricto</i> | Germany | Sputum              | No data      |  | ETest® |
| 42                   | <i>A. terreus sensu stricto</i> | Germany | Sputum              | No data      |  | ETest® |
| 43                   | <i>A. terreus sensu stricto</i> | Germany | Bronchial secretion | No data      |  | ETest® |
| 44                   | <i>A. terreus sensu stricto</i> | Germany | Tracheal secretion  | No           |  | ETest® |
| 45                   | <i>A. terreus sensu stricto</i> | Germany | BAL                 | Caspofungin  |  | ETest® |
| 46                   | <i>A. terreus sensu stricto</i> | Germany | BAL                 | No           |  | ETest® |
| 47                   | <i>A. terreus sensu stricto</i> | Germany | Sputum              | No           |  | ETest® |
| 48                   | <i>A. terreus sensu stricto</i> | Germany | No data             | No data      |  | ETest® |
| 49                   | <i>A. alabamensis</i>           | Germany | Sputum              | No data      |  | ETest® |
| 50                   | <i>A. terreus sensu stricto</i> | Austria | Swab                | No data      |  | ETest® |
| 51                   | <i>A. terreus sensu stricto</i> | Austria | Sputum              | No           |  | ETest® |
| 52                   | <i>A. terreus sensu stricto</i> | Austria | Sputum              | No           |  | ETest® |
| 53                   | <i>A. terreus sensu stricto</i> | Italy   | BAL                 | Voriconazole |  | ETest® |
| 54                   | <i>A. citrinoterreus</i>        | Spain   | Sputum              | No           |  | ETest® |

|           |                                 |         |                           |              |        |
|-----------|---------------------------------|---------|---------------------------|--------------|--------|
| <b>58</b> | <i>A. terreus sensu stricto</i> | Austria | Sputum                    | No           | ETest® |
| <b>59</b> | <i>A. terreus sensu stricto</i> | Austria | Sputum                    | No           | ETest® |
| <b>60</b> | <i>A. terreus sensu stricto</i> | Austria | Sputum                    | No           | ETest® |
| <b>61</b> | <i>A. terreus sensu stricto</i> | Italy   | No data                   | No data      | ETest® |
| <b>62</b> | <i>A. terreus sensu stricto</i> | Italy   | Tracheobronchial aspirate | No data      | ETest® |
| <b>63</b> | <i>A. alabamensis</i>           | Italy   | BAL                       | No data      | ETest® |
| <b>64</b> | <i>A. terreus sensu stricto</i> | Italy   | Sputum                    | Itraconazole | ETest® |
| <b>66</b> | <i>A. terreus sensu stricto</i> | Austria | Sputum                    | No           | ETest® |
| <b>67</b> | <i>A. terreus sensu stricto</i> | Austria | Swab                      | No           | ETest® |
| <b>69</b> | <i>A. terreus sensu stricto</i> | Austria | Sputum                    | No           | ETest® |
| <b>70</b> | <i>A. terreus sensu stricto</i> | Austria | Swab                      | No           | ETest® |
| <b>71</b> | <i>A. terreus sensu stricto</i> | Austria | Sputum                    | No           | ETest® |
| <b>73</b> | <i>A. terreus sensu stricto</i> | Austria | BAL                       | No           | ETest® |
| <b>74</b> | <i>A. terreus sensu stricto</i> | Austria | Nails                     | No           | ETest® |
| <b>75</b> | <i>A. terreus sensu stricto</i> | Austria | Nails                     | No           | ETest® |

|           |                                 |         |                           |  |                                      |        |
|-----------|---------------------------------|---------|---------------------------|--|--------------------------------------|--------|
| <b>77</b> | <i>A. terreus sensu stricto</i> | Austria | BAL                       |  | Liposomal amphotericin B, micafungin | ETest® |
| <b>78</b> | <i>A. terreus sensu stricto</i> | Denmark | Swab                      |  | No                                   | ETest® |
| <b>79</b> | <i>A. terreus sensu stricto</i> | Denmark | BAL                       |  | No                                   | ETest® |
| <b>80</b> | <i>A. terreus sensu stricto</i> | Denmark | Sputum                    |  | Itraconazole                         | ETest® |
| <b>81</b> | <i>A. terreus sensu stricto</i> | Denmark | BAL                       |  | No                                   | ETest® |
| <b>82</b> | <i>A. terreus sensu stricto</i> | Denmark | BAL                       |  | No                                   | ETest® |
| <b>83</b> | <i>A. terreus sensu stricto</i> | Denmark | Sputum                    |  | Posaconazole                         | ETest® |
| <b>84</b> | <i>A. terreus sensu stricto</i> | Denmark | Sputum                    |  | No                                   | ETest® |
| <b>85</b> | <i>A. terreus sensu stricto</i> | Denmark | BAL                       |  | No                                   | ETest® |
| <b>86</b> | <i>A. terreus sensu stricto</i> | Denmark | BAL                       |  | No                                   | ETest® |
| <b>87</b> | <i>A. terreus sensu stricto</i> | Denmark | Sputum, tracheal aspirate |  | No                                   | ETest® |
| <b>88</b> | <i>A. terreus sensu stricto</i> | Denmark | Sputum                    |  | Posaconazole                         | ETest® |
| <b>89</b> | <i>A. terreus sensu stricto</i> | Denmark | Sputum                    |  | No                                   | ETest® |
| <b>90</b> | <i>A. terreus sensu stricto</i> | Denmark | BAL                       |  | No                                   | ETest® |
| <b>91</b> | <i>A. terreus sensu stricto</i> | Denmark | Sputum                    |  | No                                   | ETest® |

---

*sensu stricto*

|            |                                 |         |          |                                            |          |
|------------|---------------------------------|---------|----------|--------------------------------------------|----------|
| <b>92</b>  | <i>A. terreus sensu stricto</i> | Denmark | Sputum   | No                                         | ETest®   |
| <b>93</b>  | <i>A. terreus sensu stricto</i> | Denmark | Aspirate | No                                         | ETest®   |
| <b>94</b>  | <i>A. terreus sensu stricto</i> | Denmark | Sputum   | Posaconazole                               | ETest®   |
| <b>95</b>  | <i>A. terreus sensu stricto</i> | India   | BAL      | No                                         | ETest®   |
| <b>96</b>  | <i>A. terreus sensu stricto</i> | India   | BAL      | Itraconazole (6 weeks along with steroids) | ETest®   |
| <b>97</b>  | <i>A. terreus sensu stricto</i> | India   | Biopsy   | No                                         | ETest®   |
| <b>98</b>  | <i>A. terreus sensu stricto</i> | India   | BAL      | No                                         | ETest®   |
| <b>99</b>  | <i>A. terreus sensu stricto</i> | India   | Biopsy   | Voriconazole                               | ETest®   |
| <b>101</b> | <i>A. terreus sensu stricto</i> | India   | BAL      | Amphotericin deoxycholate                  | B ETest® |
| <b>102</b> | <i>A. terreus sensu stricto</i> | India   | Biopsy   | Itraconazole (6 weeks along with steroids) | ETest®   |
| <b>103</b> | <i>A. terreus sensu stricto</i> | India   | BAL      | Itraconazole (6 weeks along with steroids) | ETest®   |
| <b>104</b> | <i>A. terreus sensu stricto</i> | India   | Biopsy   | Voriconazole                               | ETest®   |
| <b>105</b> | <i>A. terreus sensu stricto</i> | India   | Biopsy   | Amphotericin deoxycholate                  | B ETest® |
| <b>106</b> | <i>A. terreus sensu stricto</i> | India   | Biopsy   | No                                         | ETest®   |

---

| <i>sensu stricto</i> |                                 |         |                    |                                                                                 |        |   |
|----------------------|---------------------------------|---------|--------------------|---------------------------------------------------------------------------------|--------|---|
| <b>107</b>           | <i>A. terreus sensu stricto</i> | India   | BAL                | Itraconazole (6 weeks along with steroids)                                      | ETest® |   |
| <b>108</b>           | <i>A. terreus sensu stricto</i> | India   | Bronchial aspirate | Systemic steroids                                                               | ETest® |   |
| <b>110</b>           | <i>A. terreus sensu stricto</i> | India   | Sputum             | No                                                                              | ETest® |   |
| <b>111</b>           | <i>A. terreus sensu stricto</i> | India   | BAL                | Systemic steroids                                                               | ETest® |   |
| <b>112</b>           | <i>A. terreus sensu stricto</i> | India   | Biopsy             | Amphotericin B deoxycholate (two weeks followed by voriconazole next 3-4 weeks) | ETest® |   |
| <b>114</b>           | <i>A. terreus sensu stricto</i> | India   | BAL                | Amphotericin deoxycholate                                                       | ETest® | B |
| <b>115</b>           | <i>A. terreus sensu stricto</i> | India   | BAL                | Voriconazole                                                                    | ETest® |   |
| <b>116</b>           | <i>A. terreus sensu stricto</i> | Austria | BAL                | No                                                                              | ETest® |   |
| <b>117</b>           | <i>A. terreus sensu stricto</i> | Austria | BAL                | No                                                                              | ETest® |   |
| <b>118</b>           | <i>A. terreus sensu stricto</i> | Texas   | Biopsy             | No                                                                              | ETest® |   |
| <b>119</b>           | <i>A. hortai</i>                | Texas   | Sputum             | Liposomal amphotericin B                                                        | ETest® |   |
| <b>120</b>           | <i>A. terreus sensu stricto</i> | Texas   | No data            | No data                                                                         | ETest® |   |
| <b>121</b>           | <i>A. alabamensis</i>           | Texas   | BAL                | Liposomal amphotericin B                                                        | ETest® |   |



|            |                                 |       |                  |                                            |        |
|------------|---------------------------------|-------|------------------|--------------------------------------------|--------|
| <b>122</b> | <i>A. terreus sensu stricto</i> | Texas | BAL              | Caspofungin                                | ETest® |
| <b>123</b> | <i>A. terreus sensu stricto</i> | Texas | Peritoneal fluid | Fluconazole                                | ETest® |
| <b>124</b> | <i>A. terreus sensu stricto</i> | Texas | BAL              | No                                         | ETest® |
| <b>125</b> | <i>A. terreus sensu stricto</i> | Texas | BAL              | No                                         | ETest® |
| <b>126</b> | <i>A. terreus sensu stricto</i> | Texas | Sputum           | Voriconazole                               | ETest® |
| <b>127</b> | <i>A. terreus sensu stricto</i> | Texas | No data          | No data                                    | ETest® |
| <b>128</b> | <i>A. terreus sensu stricto</i> | India | Biopsy           | Itracoazole (6 weeks along with steroids)  | ETest® |
| <b>129</b> | <i>A. terreus sensu stricto</i> | India | BAL              | Itraconazole (6 weeks along with steroids) | ETest® |
| <b>130</b> | <i>A. terreus sensu stricto</i> | Italy | Sputum           | No                                         | ETest® |
| <b>131</b> | <i>A. terreus sensu stricto</i> | Italy | Sputum           | No                                         | ETest® |
| <b>132</b> | <i>A. terreus sensu stricto</i> | Italy | No data          | No data                                    | ETest® |
| <b>133</b> | <i>A. terreus sensu stricto</i> | Italy | Sputum           | No                                         | ETest® |
| <b>134</b> | <i>A. terreus sensu stricto</i> | Italy | Sputum           | No                                         | ETest® |
| <b>135</b> | <i>A. terreus sensu stricto</i> | Italy | Sputum           | No data                                    | ETest® |

|            |                                 |         |         |                                                   |             |
|------------|---------------------------------|---------|---------|---------------------------------------------------|-------------|
| <b>136</b> | <i>A. terreus sensu stricto</i> | Italy   | Sputum  | No                                                | ETest®      |
| <b>137</b> | <i>A. terreus sensu stricto</i> | Austria | No data | No data                                           | ETest®      |
| <b>138</b> | <i>A. terreus sensu stricto</i> | Spain   | Sputum  | Posaconazole                                      | ETest®      |
| <b>139</b> | <i>A. terreus sensu stricto</i> | Spain   | Sputum  | Posaconazole                                      | ETest®      |
| <b>140</b> | <i>A. citrinoterreus</i>        | Spain   | Sputum  | No                                                | ETest®      |
| <b>141</b> | <i>A. terreus sensu stricto</i> | Spain   | Sputum  | Voriconazole                                      | ETest®      |
| <b>142</b> | <i>A. hortai</i>                | Spain   | BAL     | Liposomal amphotericin B                          | ETest®      |
| <b>143</b> | <i>A. terreus sensu stricto</i> | Spain   | Sputum  | Voriconazole                                      | ETest®      |
| <b>144</b> | <i>A. terreus sensu stricto</i> | Spain   | BAL     | Nebulized amphotericin (profilaxis), voriconazole | ETest®<br>B |
| <b>145</b> | <i>A. terreus sensu stricto</i> | Spain   | Sputum  | No                                                | ETest®      |
| <b>146</b> | <i>A. terreus sensu stricto</i> | Spain   | Sputum  | No                                                | ETest®      |
| <b>147</b> | <i>A. terreus sensu stricto</i> | Spain   | Sputum  | No                                                | ETest®      |
| <b>148</b> | <i>A. citrinoterreus</i>        | Spain   | Sputum  | Voriconazole                                      | ETest®      |
| <b>149</b> | <i>A. citrinoterreus</i>        | Spain   | Sputum  | Voriconazole                                      | ETest®      |

|            |                                 |       |                    |                                     |           |
|------------|---------------------------------|-------|--------------------|-------------------------------------|-----------|
| <b>150</b> | <i>A. citrinoterreus</i>        | Spain | Sputum             | Voriconazole                        | ETest®    |
| <b>151</b> | <i>A. terreus sensu stricto</i> | Spain | Sputum             | No                                  | ETest®    |
| <b>152</b> | <i>A. terreus sensu stricto</i> | Spain | Bronchial aspirate | Nebulized amphotericin micafungin   | B, ETest® |
| <b>153</b> | <i>A. terreus sensu stricto</i> | Spain | Sputum             | No                                  | ETest®    |
| <b>154</b> | <i>A. terreus sensu stricto</i> | Spain | Sputum             | No                                  | ETest®    |
| <b>155</b> | <i>A. terreus sensu stricto</i> | Spain | Sputum             | No                                  | ETest®    |
| <b>156</b> | <i>A. terreus sensu stricto</i> | Spain | Sputum             | Nebulized amphotericin posaconazole | B, ETest® |
| <b>157</b> | <i>A. terreus sensu stricto</i> | Spain | Sputum             | Voriconazole                        | ETest®    |
| <b>158</b> | <i>A. hortai</i>                | Spain | Sputum             | Voriconazole                        | ETest®    |
| <b>159</b> | <i>A. terreus sensu stricto</i> | Spain | Sputum             | No                                  | ETest®    |
| <b>160</b> | <i>A. terreus sensu stricto</i> | Spain | Sputum             | No                                  | ETest®    |
| <b>161</b> | <i>A. terreus sensu stricto</i> | Spain | Sputum             | No                                  | ETest®    |
| <b>162</b> | <i>A. alabamensis</i>           | Spain | Sputum             | Liposomal amphotericin B            | ETest®    |
| <b>163</b> | <i>A. terreus sensu stricto</i> | Spain | Bronchial aspirate | Liposomal amphotericin voriconazole | B, ETest® |

|            |                                 |        |                   |                                                                                      |                   |
|------------|---------------------------------|--------|-------------------|--------------------------------------------------------------------------------------|-------------------|
| <b>164</b> | <i>A. terreus sensu stricto</i> | Spain  | Tracheal aspirate | Nebulized amphotericin (profilax), voriconazole; liposomal amphotericin voriconazole | ETest®<br>B<br>B, |
| <b>165</b> | <i>A. citrinoterreus</i>        | Spain  | Sputum            | Posaconazole                                                                         | ETest®            |
| <b>166</b> | <i>A. citrinoterreus</i>        | Spain  | Sputum            | Posaconazole                                                                         | ETest®            |
| <b>167</b> | <i>A. terreus sensu stricto</i> | Spain  | Sputum            | No                                                                                   | ETest®            |
| <b>168</b> | <i>A. terreus sensu stricto</i> | Spain  | Sputum            | Nebulized amphotericin posaconazole                                                  | ETest®<br>B,      |
| <b>169</b> | <i>A. terreus sensu stricto</i> | Spain  | Sputum            | Posaconazole                                                                         | ETest®            |
| <b>170</b> | <i>A. terreus sensu stricto</i> | Spain  | Sputum            | Posaconazole                                                                         | ETest®            |
| <b>171</b> | <i>A. terreus sensu stricto</i> | Sweden | Sputum            | No                                                                                   | ETest®            |
| <b>172</b> | <i>A. terreus sensu stricto</i> | Sweden | BAL               | No                                                                                   | ETest®            |
| <b>173</b> | <i>A. terreus sensu stricto</i> | Spain  | Sputum            | Voriconazole                                                                         | ETest®            |
| <b>174</b> | <i>A. terreus sensu stricto</i> | Spain  | Sputum            | Nebulized amphotericin B                                                             | ETest®            |
| <b>175</b> | <i>A. citrinoterreus</i>        | Spain  | BAL               | Micafungin                                                                           | ETest®            |
| <b>176</b> | <i>A. citrinoterreus</i>        | Spain  | Sputum            | No                                                                                   | ETest®            |

|            |                                 |         |                    |    |        |
|------------|---------------------------------|---------|--------------------|----|--------|
| <b>177</b> | <i>A. terreus sensu stricto</i> | Spain   | Sputum             | No | ETest® |
| <b>178</b> | <i>A. terreus sensu stricto</i> | Spain   | Sputum             | No | ETest® |
| <b>179</b> | <i>A. terreus sensu stricto</i> | Spain   | Sputum             | No | ETest® |
| <b>180</b> | <i>A. terreus sensu stricto</i> | Spain   | Bronchial aspirate | No | ETest® |
| <b>181</b> | <i>A. alabamensis</i>           | Spain   | Sputum             | No | ETest® |
| <b>182</b> | <i>A. citrinoterreus</i>        | Spain   | Sputum             | No | ETest® |
| <b>183</b> | <i>A. terreus sensu stricto</i> | Spain   | Sputum             | No | ETest® |
| <b>184</b> | <i>A. terreus sensu stricto</i> | Spain   | Bronchial aspirate | No | ETest® |
| <b>185</b> | <i>A. terreus sensu stricto</i> | Spain   | Sputum             | No | ETest® |
| <b>186</b> | <i>A. terreus sensu stricto</i> | Spain   | Sputum             | No | ETest® |
| <b>188</b> | <i>A. terreus sensu stricto</i> | Spain   | Sputum             | No | ETest® |
| <b>189</b> | <i>A. citrinoterreus</i>        | Spain   | Bronchial aspirate | No | ETest® |
| <b>190</b> | <i>A. terreus sensu stricto</i> | Spain   | Bronchial aspirate | No | ETest® |
| <b>191</b> | <i>A. terreus sensu stricto</i> | Spain   | Sputum             | No | ETest® |
| <b>192</b> | <i>A. terreus sensu stricto</i> | Belgium | Sputum             | No | ETest® |

|            |                                 |         |                   |                          |        |
|------------|---------------------------------|---------|-------------------|--------------------------|--------|
| <b>193</b> | <i>A. terreus sensu stricto</i> | Belgium | Sputum            | No                       | ETest® |
| <b>194</b> | <i>A. terreus sensu stricto</i> | Belgium | BAL               | No                       | ETest® |
| <b>196</b> | <i>A. terreus sensu stricto</i> | Spain   | Sputum            | No                       | ETest® |
| <b>197</b> | <i>A. terreus sensu stricto</i> | Serbia  | Sputum            | No                       | ETest® |
| <b>198</b> | <i>A. terreus sensu stricto</i> | Serbia  | Sputum            | No                       | ETest® |
| <b>199</b> | <i>A. terreus sensu stricto</i> | Turkey  | Swab              | No                       | ETest® |
| <b>200</b> | <i>A. terreus sensu stricto</i> | Turkey  | Swab              | No                       | ETest® |
| <b>201</b> | <i>A. terreus sensu stricto</i> | Turkey  | BAL               | No                       | ETest® |
| <b>202</b> | <i>A. terreus sensu stricto</i> | Turkey  | Tracheal aspirate | Caspofungin              | ETest® |
| <b>203</b> | <i>A. terreus sensu stricto</i> | Turkey  | Swab              | Liposomal amphotericin B | ETest® |
| <b>204</b> | <i>A. floccosus</i>             | Turkey  | Swab              | Liposomal amphotericin B | ETest® |
| <b>205</b> | <i>A. citrinoterreus</i>        | Turkey  | Tracheal aspirate | No                       | ETest® |
| <b>206</b> | <i>A. terreus sensu stricto</i> | Turkey  | Swab              | No                       | ETest® |
| <b>207</b> | <i>A. terreus sensu stricto</i> | Germany | Sputum            | No                       | ETest® |
| <b>208</b> | <i>A. terreus sensu stricto</i> | Austria | No data           | No data                  | ETest® |

|            |                                 |                |         |         |        |
|------------|---------------------------------|----------------|---------|---------|--------|
| <b>209</b> | <i>A. terreus sensu stricto</i> | Austria        | No data | No      | ETest® |
| <b>210</b> | <i>A. terreus sensu stricto</i> | Netherlands    | BAL     | No      | ETest® |
| <b>211</b> | <i>A. terreus sensu stricto</i> | Netherlands    | BAL     | No      | ETest® |
| <b>212</b> | <i>A. terreus sensu stricto</i> | Netherlands    | Swab    | No      | ETest® |
| <b>213</b> | <i>A. terreus sensu stricto</i> | Netherlands    | Sputum  | No      | ETest® |
| <b>214</b> | <i>A. terreus sensu stricto</i> | Netherlands    | Sputum  | No      | ETest® |
| <b>215</b> | <i>A. terreus sensu stricto</i> | Netherlands    | Sputum  | No      | ETest® |
| <b>216</b> | <i>A. terreus sensu stricto</i> | Netherlands    | Sputum  | No      | ETest® |
| <b>217</b> | <i>A. citrinoterreus</i>        | Netherlands    | Sputum  | No      | ETest® |
| <b>218</b> | <i>A. terreus sensu stricto</i> | Netherlands    | Sputum  | No      | ETest® |
| <b>219</b> | <i>A. terreus sensu stricto</i> | Greece         | BAL     | No      | ETest® |
| <b>220</b> | <i>A. citrinoterreus</i>        | Greece         | Nails   | No      | ETest® |
| <b>221</b> | <i>A. terreus sensu stricto</i> | Greece         | Swab    | No      | ETest® |
| <b>222</b> | <i>A. terreus sensu stricto</i> | no data        | No data | No data | ETest® |
| <b>223</b> | <i>A. terreus sensu stricto</i> | United Kingdom | Blood   | No      | ETest® |

|            |                                 |                |                       |                 |        |
|------------|---------------------------------|----------------|-----------------------|-----------------|--------|
| <b>224</b> | <i>A. terreus sensu stricto</i> | United Kingdom | BAL                   | Voriconazole    | ETest® |
| <b>225</b> | <i>A. alabamensis</i>           | United Kingdom | Swab                  | No              | ETest® |
| <b>226</b> | <i>A. terreus sensu stricto</i> | United Kingdom | Swab                  | No              | ETest® |
| <b>227</b> | <i>A. terreus sensu stricto</i> | United Kingdom | Sputum                | No              | ETest® |
| <b>228</b> | <i>A. citrinoterreus</i>        | United Kingdom | Sputum                | No              | ETest® |
| <b>229</b> | <i>A. citrinoterreus</i>        | United Kingdom | BAL                   | Voriconazole    | ETest® |
| <b>230</b> | <i>A. terreus sensu stricto</i> | Qatar          | Sputum                | No              | ETest® |
| <b>231</b> | <i>A. terreus sensu stricto</i> | Qatar          | Swab                  | No              | ETest® |
| <b>232</b> | <i>A. terreus sensu stricto</i> | Qatar          | Sputum                | No              | ETest® |
| <b>233</b> | <i>A. citrinoterreus</i>        | Qatar          | Swab                  | No              | ETest® |
| <b>234</b> | <i>A. citrinoterreus</i>        | Qatar          | Endotracheal aspirate | No              | ETest® |
| <b>235</b> | <i>A. terreus sensu stricto</i> | Qatar          | BAL                   | No              | ETest® |
| <b>236</b> | <i>A. terreus sensu stricto</i> | Qatar          | Sputum                | No              | ETest® |
| <b>237</b> | <i>A. terreus sensu stricto</i> | Qatar          | Swab                  | Clotrimazole 1% | ETest® |
| <b>238</b> | <i>A. terreus sensu stricto</i> | Qatar          | BAL                   | Anidulafungin   | ETest® |



|            |                                 |         |                |                 |        |
|------------|---------------------------------|---------|----------------|-----------------|--------|
| <b>239</b> | <i>A. terreus sensu stricto</i> | Qatar   | Swab           | No              | ETest® |
| <b>240</b> | <i>A. terreus sensu stricto</i> | Qatar   | Swab           | No              | ETest® |
| <b>241</b> | <i>A. terreus sensu stricto</i> | Qatar   | Sputum         | Anidulafungin   | ETest® |
| <b>242</b> | <i>A. terreus sensu stricto</i> | Qatar   | Swab           | No              | ETest® |
| <b>243</b> | <i>A. citrinoterreus</i>        | Qatar   | Biopsy         | Itraconazole    | ETest® |
| <b>244</b> | <i>A. terreus sensu stricto</i> | Qatar   | Sputum         | No              | ETest® |
| <b>245</b> | <i>A. terreus sensu stricto</i> | Qatar   | Swab           | Clotrimazole 1% | ETest® |
| <b>246</b> | <i>A. terreus sensu stricto</i> | Qatar   | BAL            | No              | ETest® |
| <b>247</b> | <i>A. terreus sensu stricto</i> | Qatar   | Bronchial wash | No              | ETest® |
| <b>248</b> | <i>A. terreus sensu stricto</i> | Germany | No data        | No data         | ETest® |
| <b>249</b> | <i>A. terreus sensu stricto</i> | Spain   | Sputum         | No              | ETest® |
| <b>250</b> | <i>A. terreus sensu stricto</i> | Spain   | Sputum         | No              | ETest® |
| <b>251</b> | <i>A. terreus sensu stricto</i> | Spain   | Nails          | No              | ETest® |
| <b>252</b> | <i>A. terreus sensu stricto</i> | Spain   | Sputum         | Voriconazole    | ETest® |
| <b>253</b> | <i>A. terreus sensu stricto</i> | Spain   | Sputum         | No              | ETest® |

|            |                                 |       |        |              |        |
|------------|---------------------------------|-------|--------|--------------|--------|
| <b>254</b> | <i>A. terreus sensu stricto</i> | Spain | Nails  | No           | ETest® |
| <b>255</b> | <i>A. terreus sensu stricto</i> | Spain | Sputum | No           | ETest® |
| <b>256</b> | <i>A. citrinoterreus</i>        | Spain | Sputum | Voriconazole | ETest® |
| <b>257</b> | <i>A. terreus sensu stricto</i> | Spain | Sputum | No           | ETest® |
| <b>258</b> | <i>A. terreus sensu stricto</i> | Spain | Sputum | Voriconazole | ETest® |
| <b>259</b> | <i>A. terreus sensu stricto</i> | Spain | Sputum | No           | ETest® |
| <b>260</b> | <i>A. citrinoterreus</i>        | Spain | Sputum | No           | ETest® |
| <b>261</b> | <i>A. terreus sensu stricto</i> | Spain | Sputum | No           | ETest® |
| <b>262</b> | <i>A. neoafricanus</i>          | Spain | Nails  | No           | ETest® |
| <b>263</b> | <i>A. citrinoterreus</i>        | Spain | Nails  | No           | ETest® |
| <b>264</b> | <i>A. terreus sensu stricto</i> | Spain | Sputum | Voriconazole | ETest® |
| <b>265</b> | <i>A. terreus sensu stricto</i> | Spain | Sputum | Itraconazole | ETest® |
| <b>266</b> | <i>A. terreus sensu stricto</i> | Spain | Sputum | No           | ETest® |
| <b>267</b> | <i>A. terreus sensu stricto</i> | Spain | Sputum | No           | ETest® |
| <b>268</b> | <i>A. terreus sensu stricto</i> | Spain | Nails  | No           | ETest® |

|            |                                 |       |                    |                |        |
|------------|---------------------------------|-------|--------------------|----------------|--------|
| <b>269</b> | <i>A. terreus sensu stricto</i> | Spain | Nails              | No             | ETest® |
| <b>270</b> | <i>A. terreus sensu stricto</i> | Spain | Nails              | No             | ETest® |
| <b>271</b> | <i>A. terreus sensu stricto</i> | Spain | Nails              | No             | ETest® |
| <b>272</b> | <i>A. terreus sensu stricto</i> | Spain | Nails              | No             | ETest® |
| <b>273</b> | <i>A. terreus sensu stricto</i> | Spain | Sputum             | Voriconazole   | ETest® |
| <b>274</b> | <i>A. terreus sensu stricto</i> | Spain | Nails              | No             | ETest® |
| <b>275</b> | <i>A. citrinoterreus</i>        | Spain | Sputum             | No             | ETest® |
| <b>276</b> | <i>A. terreus sensu stricto</i> | Spain | Nails              | No             | ETest® |
| <b>277</b> | <i>A. citrinoterreus</i>        | Spain | Nails              | No             | ETest® |
| <b>278</b> | <i>A. citrinoterreus</i>        | Iran  | Biopsy             | Amphotericin B | ETest® |
| <b>279</b> | <i>A. citrinoterreus</i>        | Iran  | BAL                | No data        | ETest® |
| <b>280</b> | <i>A. citrinoterreus</i>        | Iran  | Biopsy             | No data        | ETest® |
| <b>281</b> | <i>A. citrinoterreus</i>        | Iran  | Sinuses discharge  | No data        | ETest® |
| <b>282</b> | <i>A. terreus sensu stricto</i> | Iran  | Environment (swab) | No data        | ETest® |
| <b>283</b> | <i>A. terreus sensu stricto</i> | Iran  | Swab               | Itraconazole   | ETest® |

|            |                                 |                |         |              |        |
|------------|---------------------------------|----------------|---------|--------------|--------|
| <b>284</b> | <i>A. terreus sensu stricto</i> | Iran           | BAL     | Itraconazole | ETest® |
| <b>285</b> | <i>A. terreus sensu stricto</i> | Iran           | Biopsy  | No data      | ETest® |
| <b>286</b> | <i>A. terreus sensu stricto</i> | Iran           | Swab    | Itraconazole | ETest® |
| <b>287</b> | <i>A. terreus sensu stricto</i> | Iran           | Biopsy  | No data      | ETest® |
| <b>288</b> | <i>A. terreus sensu stricto</i> | Iran           | Swab    | Itraconazole | ETest® |
| <b>289</b> | <i>A. terreus sensu stricto</i> | Austria        | No data | No data      | ETest® |
| <b>290</b> | <i>A. citrinoterreus</i>        | Austria        | No data | No data      | ETest® |
| <b>291</b> | <i>A. terreus sensu stricto</i> | Austria        | No data | No data      | ETest® |
| <b>292</b> | <i>A. terreus sensu stricto</i> | Austria        | No data | No data      | ETest® |
| <b>293</b> | <i>A. terreus sensu stricto</i> | Austria        | No data | No data      | ETest® |
| <b>294</b> | <i>A. terreus sensu stricto</i> | Austria        | No data | No data      | ETest® |
| <b>295</b> | <i>A. terreus sensu stricto</i> | Austria        | No data | No data      | ETest® |
| <b>296</b> | <i>A. terreus sensu stricto</i> | Austria        | No data | No data      | ETest® |
| <b>297</b> | <i>A. citrinoterreus</i>        | Czech Republic | Swab    | No           | ETest® |
| <b>298</b> | <i>A. terreus sensu stricto</i> | Czech Republic | BAL     | Itraconazole | ETest® |

|            |                                 |                |                    |              |        |
|------------|---------------------------------|----------------|--------------------|--------------|--------|
| <b>299</b> | <i>A. terreus sensu stricto</i> | Czech Republic | Swab               | No           | ETest® |
| <b>300</b> | <i>A. hortai</i>                | Czech Republic | Swab               | No           | ETest® |
| <b>301</b> | <i>A. terreus sensu stricto</i> | Czech Republic | Swab               | No           | ETest® |
| <b>302</b> | <i>A. hortai</i>                | Czech Republic | Sputum             | No           | ETest® |
| <b>303</b> | <i>A. terreus sensu stricto</i> | Czech Republic | Tracheal secretion | Voriconazole | ETest® |
| <b>304</b> | <i>A. terreus sensu stricto</i> | Czech Republic | No data            | No data      | ETest® |
| <b>305</b> | <i>A. terreus sensu stricto</i> | Czech Republic | No data            | No data      | ETest® |
| <b>306</b> | <i>A. hortai</i>                | Czech Republic | No data            | No data      | ETest® |
| <b>307</b> | <i>A. terreus sensu stricto</i> | Czech Republic | No data            | No data      | ETest® |
| <b>308</b> | <i>A. citrinoterreus</i>        | Israel         | No data            | No data      | ETest® |
| <b>309</b> | <i>A. citrinoterreus</i>        | Israel         | No data            | No data      | ETest® |
| <b>310</b> | <i>A. terreus sensu stricto</i> | Israel         | No data            | No data      | ETest® |
| <b>311</b> | <i>A. terreus sensu stricto</i> | Israel         | No data            | No data      | ETest® |
| <b>312</b> | <i>A. terreus sensu stricto</i> | Israel         | No data            | No data      | ETest® |
| <b>313</b> | <i>A. terreus sensu stricto</i> | Israel         | No data            | No data      | ETest® |

|            |                                 |        |         |         |        |
|------------|---------------------------------|--------|---------|---------|--------|
| <b>315</b> | <i>A. terreus sensu stricto</i> | Israel | No data | No data | ETest® |
| <b>316</b> | <i>A. terreus sensu stricto</i> | Israel | No data | No data | ETest® |
| <b>317</b> | <i>A. terreus sensu stricto</i> | Israel | No data | No data | ETest® |
| <b>318</b> | <i>A. terreus sensu stricto</i> | Israel | No data | No data | ETest® |
| <b>319</b> | <i>A. terreus sensu stricto</i> | Israel | No data | No data | ETest® |
| <b>320</b> | <i>A. hortai</i>                | Israel | No data | No data | ETest® |
| <b>321</b> | <i>A. terreus sensu stricto</i> | Israel | No data | No data | ETest® |
| <b>322</b> | <i>A. terreus sensu stricto</i> | Israel | No data | No data | ETest® |
| <b>323</b> | <i>A. terreus sensu stricto</i> | Israel | No data | No data | ETest® |
| <b>324</b> | <i>A. citrinoterreus</i>        | Israel | No data | No data | ETest® |
| <b>325</b> | <i>A. terreus sensu stricto</i> | Israel | No data | No data | ETest® |
| <b>326</b> | <i>A. terreus sensu stricto</i> | Israel | No data | No data | ETest® |
| <b>327</b> | <i>A. terreus sensu stricto</i> | Israel | No data | No data | ETest® |
| <b>328</b> | <i>A. terreus sensu stricto</i> | Israel | No data | No data | ETest® |
| <b>329</b> | <i>A. terreus sensu stricto</i> | Israel | No data | No data | ETest® |

|            |                                 |         |         |         |        |
|------------|---------------------------------|---------|---------|---------|--------|
| <b>330</b> | <i>A. terreus sensu stricto</i> | Israel  | No data | No data | ETest® |
| <b>331</b> | <i>A. terreus sensu stricto</i> | Israel  | No data | No data | ETest® |
| <b>332</b> | <i>A. citrinoterreus</i>        | Israel  | No data | No data | ETest® |
| <b>333</b> | <i>A. terreus sensu stricto</i> | Israel  | No data | No data | ETest® |
| <b>334</b> | <i>A. terreus sensu stricto</i> | Israel  | No data | No data | ETest® |
| <b>335</b> | <i>A. terreus sensu stricto</i> | Israel  | No data | No data | ETest® |
| <b>336</b> | <i>A. terreus sensu stricto</i> | Israel  | No data | No data | ETest® |
| <b>337</b> | <i>A. terreus sensu stricto</i> | Israel  | No data | No data | ETest® |
| <b>338</b> | <i>A. terreus sensu stricto</i> | Israel  | No data | No data | ETest® |
| <b>339</b> | <i>A. terreus sensu stricto</i> | Israel  | No data | No data | ETest® |
| <b>340</b> | <i>A. terreus sensu stricto</i> | Israel  | No data | No data | ETest® |
| <b>341</b> | <i>A. terreus sensu stricto</i> | Israel  | No data | No data | ETest® |
| <b>342</b> | <i>A. terreus sensu stricto</i> | No data | No data | No data | ETest® |
| <b>343</b> | <i>A. terreus sensu stricto</i> | Austria | No data | No data | ETest® |
| <b>344</b> | <i>A. terreus sensu stricto</i> | Austria | No data | No data | ETest® |

|            |                                 |         |                    |         |        |
|------------|---------------------------------|---------|--------------------|---------|--------|
| <b>345</b> | <i>A. terreus sensu stricto</i> | Austria | No data            | No data | ETest® |
| <b>346</b> | <i>A. terreus sensu stricto</i> | Austria | No data            | No data | ETest® |
| <b>347</b> | <i>A. terreus sensu stricto</i> | Austria | No data            | No data | ETest® |
| <b>348</b> | <i>A. terreus sensu stricto</i> | Austria | No data            | No data | ETest® |
| <b>349</b> | <i>A. hortai</i>                | Italy   | No data            | No data | ETest® |
| <b>350</b> | <i>A. terreus sensu stricto</i> | Italy   | Toenail            |         | ETest® |
| <b>351</b> | <i>A. hortai</i>                | Brazil  | No data            | No data | ETest® |
| <b>352</b> | <i>A. terreus sensu stricto</i> | Brazil  | Environment (swab) | No data | ETest® |
| <b>353</b> | <i>A. terreus sensu stricto</i> | Brazil  | No data            | No data | ETest® |
| <b>354</b> | <i>A. terreus sensu stricto</i> | Brazil  | No data            | No data | ETest® |
| <b>355</b> | <i>A. terreus sensu stricto</i> | Brazil  | No data            | No data | ETest® |
| <b>356</b> | <i>A. terreus sensu stricto</i> | Brazil  | No data            | No data | ETest® |
| <b>357</b> | <i>A. terreus sensu stricto</i> | Brazil  | No data            | No data | ETest® |
| <b>358</b> | <i>A. terreus sensu stricto</i> | France  | Sputum             | No data | ETest® |
| <b>359</b> | <i>A. terreus sensu stricto</i> | France  | Sputum             | No data | ETest® |



|            |                                 |         |         |                            |        |
|------------|---------------------------------|---------|---------|----------------------------|--------|
| <b>360</b> | <i>A. terreus sensu stricto</i> | France  | Sputum  | No data                    | ETest® |
| <b>361</b> | <i>A. terreus sensu stricto</i> | France  | Sputum  | No data                    | ETest® |
| <b>362</b> | <i>A. terreus sensu stricto</i> | France  | Sputum  | No data                    | ETest® |
| <b>363</b> | <i>A. terreus sensu stricto</i> | France  | Sputum  | No data                    | ETest® |
| <b>364</b> | <i>A. terreus sensu stricto</i> | France  | Sputum  | No data                    | ETest® |
| <b>365</b> | <i>A. terreus sensu stricto</i> | France  | Sputum  | No data                    | ETest® |
| <b>366</b> | <i>A. terreus sensu stricto</i> | France  | Sputum  | No data                    | ETest® |
| <b>367</b> | <i>A. terreus sensu stricto</i> | France  | Sputum  | No data                    | ETest® |
| <b>368</b> | <i>A. terreus sensu stricto</i> | France  | Sputum  | No data                    | ETest® |
| <b>369</b> | <i>A. terreus sensu stricto</i> | Austria | No data | No data                    | ETest® |
| <b>371</b> | <i>A. terreus sensu stricto</i> | Austria | No data | No data                    | ETest® |
| <b>372</b> | <i>A. terreus sensu stricto</i> | Austria | No data | No data                    | ETest® |
| <b>373</b> | <i>A. terreus sensu stricto</i> | Greece  | Sputum  | Liposomales amphotericin B | ETest® |
| <b>374</b> | <i>A. terreus sensu stricto</i> | Greece  | Sputum  | Liposomales amphotericin B | ETest® |
| <b>375</b> | <i>A. terreus sensu stricto</i> | Greece  | Sputum  | Liposomales amphotericin B | ETest® |

|             |                                 |                |                 |              |        |
|-------------|---------------------------------|----------------|-----------------|--------------|--------|
| <b>376</b>  | <i>A. terreus sensu stricto</i> | Portugal       | BAL             | No data      | ETest® |
| <b>377</b>  | <i>A. terreus sensu stricto</i> | Portugal       | BAL             | No data      | ETest® |
| <b>378</b>  | <i>A. terreus sensu stricto</i> | Czech Republic | Puncture        | No           | ETest® |
| <b>379</b>  | <i>A. terreus sensu stricto</i> | Czech Republic | Swab            | No           | ETest® |
| <b>380</b>  | <i>A. terreus sensu stricto</i> | Spain          | Nails           | No           | ETest® |
| <b>381</b>  | <i>A. terreus sensu stricto</i> | Spain          | Sputum          | Voriconazole | ETest® |
| <b>382</b>  | <i>A. terreus sensu stricto</i> | Spain          | Surgical injury | No           | ETest® |
| <b>383</b>  | <i>A. terreus sensu stricto</i> | Spain          | Sputum          | No           | ETest® |
| <b>384</b>  | <i>A. terreus sensu stricto</i> | Czech Republic | No data         | No data      | ETest® |
| <b>T10</b>  | <i>A. terreus sensu stricto</i> | Austria        | No data         | No data      | EUCAST |
| <b>T100</b> | <i>A. terreus sensu stricto</i> | Austria        | Sputum          | No data      | EUCAST |
| <b>T101</b> | <i>A. terreus sensu stricto</i> | Austria        | BAL             | No data      | EUCAST |
| <b>T102</b> | <i>A. terreus sensu stricto</i> | Austria        | BAL             | No data      | EUCAST |
| <b>T103</b> | <i>A. terreus sensu stricto</i> | Austria        | Sputum          | No data      | EUCAST |
| <b>T104</b> | <i>A. terreus sensu stricto</i> | UK             | No data         | No data      | EUCAST |

|             |                                 |             |                    |         |        |
|-------------|---------------------------------|-------------|--------------------|---------|--------|
| <b>T105</b> | <i>A. citrinoterreus</i>        | Austria     | Sputum             | No data | EUCAST |
| <b>T106</b> | <i>A. terreus sensu stricto</i> | Austria     | Sputum             | No data | EUCAST |
| <b>T107</b> | <i>A. terreus sensu stricto</i> | Austria     | BAL                | No data | EUCAST |
| <b>T109</b> | <i>A. alabamensis</i>           | Netherlands | No data            | No data | EUCAST |
| <b>T11</b>  | <i>A. terreus sensu stricto</i> | Austria     | No data            | No data | EUCAST |
| <b>T110</b> | <i>A. alabamensis</i>           | Netherlands | No data            | No data | EUCAST |
| <b>T112</b> | <i>A. terreus sensu stricto</i> | Germany     | Swab               | No data | EUCAST |
| <b>T113</b> | <i>A. terreus sensu stricto</i> | Austria     | No data            | No data | EUCAST |
| <b>T12</b>  | <i>A. terreus sensu stricto</i> | Austria     | No data            | No data | EUCAST |
| <b>T128</b> | <i>A. terreus sensu stricto</i> | Germany     | Bronhial secretion | No data | EUCAST |
| <b>T129</b> | <i>A. citrinoterreus</i>        | Germany     | Swab               | No data | EUCAST |
| <b>T13</b>  | <i>A. terreus sensu stricto</i> | Austria     | No data            | No data | EUCAST |
| <b>T130</b> | <i>A. terreus sensu stricto</i> | Austria     | BAL                | No data | EUCAST |
| <b>T131</b> | <i>A. terreus sensu stricto</i> | Austria     | Sputum             | No data | EUCAST |
| <b>T132</b> | <i>A. terreus sensu stricto</i> | Austria     | No data            | No data | EUCAST |

|             |                                 |         |                    |         |        |
|-------------|---------------------------------|---------|--------------------|---------|--------|
| <b>T134</b> | <i>A. terreus sensu stricto</i> | Austria | No data            | No data | EUCAST |
| <b>T135</b> | <i>A. terreus sensu stricto</i> | Austria | No data            | No data | EUCAST |
| <b>T136</b> | <i>A. terreus sensu stricto</i> | Germany | Nails              | No data | EUCAST |
| <b>T139</b> | <i>A. hortai</i>                | Germany | Swab               | No data | EUCAST |
| <b>T14</b>  | <i>A. terreus sensu stricto</i> | Austria | No data            | No data | EUCAST |
| <b>T140</b> | <i>A. terreus sensu stricto</i> | Germany | Swab               | No data | EUCAST |
| <b>T141</b> | <i>A. terreus sensu stricto</i> | Austria | No data            | No data | EUCAST |
| <b>T144</b> | <i>A. terreus sensu stricto</i> | Germany | Bronhial secretion | No data | EUCAST |
| <b>T146</b> | <i>A. terreus sensu stricto</i> | Austria | No data            | No data | EUCAST |
| <b>T147</b> | <i>A. terreus sensu stricto</i> | Germany | Swab               | No data | EUCAST |
| <b>T148</b> | <i>A. terreus sensu stricto</i> | Germany | Swab               | No data | EUCAST |
| <b>T149</b> | <i>A. citrinoterreus</i>        | Germany | Swab               | No data | EUCAST |
| <b>T15</b>  | <i>A. terreus sensu stricto</i> | Austria | No data            | No data | EUCAST |
| <b>T150</b> | <i>A. citrinoterreus</i>        | Germany | No data            | No data | EUCAST |
| <b>T152</b> | <i>A. terreus sensu stricto</i> | Austria | No data            | No data | EUCAST |

|             |                                 |         |         |         |        |
|-------------|---------------------------------|---------|---------|---------|--------|
| <b>T153</b> | <i>A. terreus sensu stricto</i> | Austria | No data | No data | EUCAST |
| <b>T154</b> | <i>A. terreus sensu stricto</i> | Austria | No data | No data | EUCAST |
| <b>T155</b> | <i>A. terreus sensu stricto</i> | Austria | No data | No data | EUCAST |
| <b>T156</b> | <i>A. terreus sensu stricto</i> | Germany | No data | No data | EUCAST |
| <b>T157</b> | <i>A. terreus sensu stricto</i> | Austria | No data | No data | EUCAST |
| <b>T158</b> | <i>A. terreus sensu stricto</i> | Austria | No data | No data | EUCAST |
| <b>T159</b> | <i>A. terreus sensu stricto</i> | Austria | No data | No data | EUCAST |
| <b>T16</b>  | <i>A. terreus sensu stricto</i> | Austria | No data | No data | EUCAST |
| <b>T160</b> | <i>A. terreus sensu stricto</i> | Germany | No data | No data | EUCAST |
| <b>T17</b>  | <i>A. terreus sensu stricto</i> | Austria | No data | No data | EUCAST |
| <b>T18</b>  | <i>A. terreus sensu stricto</i> | Austria | No data | No data | EUCAST |
| <b>T19</b>  | <i>A. terreus sensu stricto</i> | Austria | No data | No data | EUCAST |
| <b>T2</b>   | <i>A. terreus sensu stricto</i> | Austria | No data | No data | EUCAST |
| <b>T20</b>  | <i>A. terreus sensu stricto</i> | Austria | No data | No data | EUCAST |
| <b>T21</b>  | <i>A. terreus sensu stricto</i> | Austria | No data | No data | EUCAST |

|            |                                 |         |         |         |        |
|------------|---------------------------------|---------|---------|---------|--------|
| <b>T22</b> | <i>A. terreus sensu stricto</i> | Austria | Sputum  | No data | EUCAST |
| <b>T24</b> | <i>A. terreus sensu stricto</i> | Austria | No data | No data | EUCAST |
| <b>T25</b> | <i>A. terreus sensu stricto</i> | Austria | No data | No data | EUCAST |
| <b>T26</b> | <i>A. terreus sensu stricto</i> | Austria | No data | No data | EUCAST |
| <b>T27</b> | <i>A. terreus sensu stricto</i> | Austria | No data | No data | EUCAST |
| <b>T28</b> | <i>A. terreus sensu stricto</i> | Austria | No data | No data | EUCAST |
| <b>T29</b> | <i>A. terreus sensu stricto</i> | Austria | No data | No data | EUCAST |
| <b>T3</b>  | <i>A. terreus sensu stricto</i> | Austria | No data | No data | EUCAST |
| <b>T30</b> | <i>A. terreus sensu stricto</i> | Austria | No data | No data | EUCAST |
| <b>T31</b> | <i>A. terreus sensu stricto</i> | Austria | No data | No data | EUCAST |
| <b>T32</b> | <i>A. terreus sensu stricto</i> | Austria | BAL     | No data | EUCAST |
| <b>T34</b> | <i>A. terreus sensu stricto</i> | Austria | BAL     | No data | EUCAST |
| <b>T35</b> | <i>A. terreus sensu stricto</i> | Austria | Sputum  | No data | EUCAST |
| <b>T36</b> | <i>A. terreus sensu stricto</i> | Austria | Biopsy  | No data | EUCAST |
| <b>T4</b>  | <i>A. terreus sensu stricto</i> | Austria | No data | No data | EUCAST |

|            |                                 |         |                     |         |        |
|------------|---------------------------------|---------|---------------------|---------|--------|
| <b>T40</b> | <i>A. terreus sensu stricto</i> | Austria | No data             | No data | EUCAST |
| <b>T41</b> | <i>A. terreus sensu stricto</i> | Austria | No data             | No data | EUCAST |
| <b>T42</b> | <i>A. terreus sensu stricto</i> | Austria | No data             | No data | EUCAST |
| <b>T43</b> | <i>A. terreus sensu stricto</i> | Austria | Biopsy              | No data | EUCAST |
| <b>T44</b> | <i>A. terreus sensu stricto</i> | Austria | Bronchial secretion | No data | EUCAST |
| <b>T47</b> | <i>A. terreus sensu stricto</i> | Austria | No data             | No data | EUCAST |
| <b>T49</b> | <i>A. terreus sensu stricto</i> | Austria | Environment (swab)  | No data | EUCAST |
| <b>T5</b>  | <i>A. terreus sensu stricto</i> | Austria | No data             | No data | EUCAST |
| <b>T50</b> | <i>A. terreus sensu stricto</i> | Austria | Swab                | No data | EUCAST |
| <b>T51</b> | <i>A. terreus sensu stricto</i> | Austria | BAL                 | No data | EUCAST |
| <b>T52</b> | <i>A. terreus sensu stricto</i> | Germany | No data             | No data | EUCAST |
| <b>T53</b> | <i>A. hortai</i>                | Germany | No data             | No data | EUCAST |
| <b>T54</b> | <i>A. terreus sensu stricto</i> | Germany | No data             | No data | EUCAST |
| <b>T55</b> | <i>A. terreus sensu stricto</i> | Germany | No data             | No data | EUCAST |
| <b>T56</b> | <i>A. terreus sensu stricto</i> | Germany | No data             | No data | EUCAST |

|            |                                 |         |                     |         |        |
|------------|---------------------------------|---------|---------------------|---------|--------|
| <b>T57</b> | <i>A. terreus sensu stricto</i> | Germany | No data             | No data | EUCAST |
| <b>T58</b> | <i>A. terreus sensu stricto</i> | Germany | No data             | No data | EUCAST |
| <b>T59</b> | <i>A. terreus sensu stricto</i> | Germany | No data             | No data | EUCAST |
| <b>T6</b>  | <i>A. terreus sensu stricto</i> | Austria | No data             | No data | EUCAST |
| <b>T60</b> | <i>A. terreus sensu stricto</i> | Germany | No data             | No data | EUCAST |
| <b>T61</b> | <i>A. terreus sensu stricto</i> | Austria | BAL                 | No data | EUCAST |
| <b>T62</b> | <i>A. terreus sensu stricto</i> | Austria | Bronchial secretion | No data | EUCAST |
| <b>T63</b> | <i>A. terreus sensu stricto</i> | Austria | Biopsy              | No data | EUCAST |
| <b>T64</b> | <i>A. terreus sensu stricto</i> | Austria | Swab                | No data | EUCAST |
| <b>T65</b> | <i>A. terreus sensu stricto</i> | Austria | Sputum              | No data | EUCAST |
| <b>T66</b> | <i>A. hortai</i>                | Austria | Swab                | No data | EUCAST |
| <b>T67</b> | <i>A. terreus sensu stricto</i> | Austria | Bronchial secretion | No data | EUCAST |
| <b>T68</b> | <i>A. terreus sensu stricto</i> | Austria | BAL                 | No data | EUCAST |
| <b>T69</b> | <i>A. terreus sensu stricto</i> | Austria | BAL                 | No data | EUCAST |
| <b>T7</b>  | <i>A. terreus sensu stricto</i> | Austria | No data             | No data | EUCAST |



|            |                                 |         |         |         |        |
|------------|---------------------------------|---------|---------|---------|--------|
| <b>T70</b> | <i>A. citrinoterreus</i>        | Austria | No data | No data | EUCAST |
| <b>T71</b> | <i>A. terreus sensu stricto</i> | Austria | BAL     | No data | EUCAST |
| <b>T72</b> | <i>A. terreus sensu stricto</i> | Austria | BAL     | No data | EUCAST |
| <b>T73</b> | <i>A. terreus sensu stricto</i> | Austria | Biopsy  | No data | EUCAST |
| <b>T74</b> | <i>A. terreus sensu stricto</i> | Spain   | No data | No data | EUCAST |
| <b>T75</b> | <i>A. terreus sensu stricto</i> | Spain   | No data | No data | EUCAST |
| <b>T76</b> | <i>A. terreus sensu stricto</i> | Germany | Swab    | No data | EUCAST |
| <b>T77</b> | <i>A. terreus sensu stricto</i> | Italy   | Swab    | No data | EUCAST |
| <b>T78</b> | <i>A. terreus sensu stricto</i> | Italy   | No data | No data | EUCAST |
| <b>T79</b> | <i>A. terreus sensu stricto</i> | Italy   | No data | No data | EUCAST |
| <b>T8</b>  | <i>A. terreus sensu stricto</i> | Austria | No data | No data | EUCAST |
| <b>T80</b> | <i>A. terreus sensu stricto</i> | Italy   | No data | No data | EUCAST |
| <b>T81</b> | <i>A. terreus sensu stricto</i> | Italy   | No data | No data | EUCAST |
| <b>T82</b> | <i>A. terreus sensu stricto</i> | Italy   | No data | No data | EUCAST |
| <b>T83</b> | <i>A. terreus sensu stricto</i> | Italy   | No data | No data | EUCAST |

|            |                                 |         |                     |         |        |
|------------|---------------------------------|---------|---------------------|---------|--------|
| <b>T84</b> | <i>A. terreus sensu stricto</i> | Italy   | No data             | No data | EUCAST |
| <b>T85</b> | <i>A. terreus sensu stricto</i> | Italy   | No data             | No data | EUCAST |
| <b>T86</b> | <i>A. terreus sensu stricto</i> | Italy   | No data             | No data | EUCAST |
| <b>T87</b> | <i>A. terreus sensu stricto</i> | Italy   | No data             | No data | EUCAST |
| <b>T88</b> | <i>A. terreus sensu stricto</i> | Italy   | No data             | No data | EUCAST |
| <b>T89</b> | <i>A. terreus sensu stricto</i> | Italy   | No data             | No data | EUCAST |
| <b>T9</b>  | <i>A. terreus sensu stricto</i> | Austria | No data             | No data | EUCAST |
| <b>T90</b> | <i>A. citrinoterreus</i>        | Italy   | No data             | No data | EUCAST |
| <b>T91</b> | <i>A. terreus sensu stricto</i> | Germany | Swab                | No data | EUCAST |
| <b>T92</b> | <i>A. terreus sensu stricto</i> | Germany | Swab                | No data | EUCAST |
| <b>T93</b> | <i>A. terreus sensu stricto</i> | Austria | Bronchial secretion | No data | EUCAST |
| <b>T94</b> | <i>A. terreus sensu stricto</i> | Austria | Biopsy              | No data | EUCAST |
| <b>T95</b> | <i>A. terreus sensu stricto</i> | Austria | Sputum              | No data | EUCAST |
| <b>T96</b> | <i>A. terreus sensu stricto</i> | Austria | Biopsy              | No data | EUCAST |
| <b>T97</b> | <i>A. terreus sensu stricto</i> | Austria | BAL                 | No data | EUCAST |

|            |                                 |         |         |         |        |
|------------|---------------------------------|---------|---------|---------|--------|
| <b>T98</b> | <i>A. terreus sensu stricto</i> | Austria | BAL     | No data | EUCAST |
| <b>T99</b> | <i>A. terreus sensu stricto</i> | Austria | No data | No data | EUCAST |

---

EUCAST. European Committee for Antimicrobial Susceptibility. BAL. bronchoalveolar lavage.

**Supplementary Table S2.** Wild type reference strains used for *cyp51a* sequencing for *Aspergillus terreus* and *Aspergillus citrinoterreus*

---

|                                                           |                                             |
|-----------------------------------------------------------|---------------------------------------------|
| <b>Wild type strain <i>Aspergillus terreus</i></b>        | NIH2624                                     |
| <b>Wild type strain <i>Aspergillus citrinoterreus</i></b> | 3 (environmental azole susceptible isolate) |

---

**Supplementary Table S3.** Primers for *Cyp51A* sequencing used in study

| <b>Primer</b>     | <b>Sequence</b>              | <b>Purpose</b>               |
|-------------------|------------------------------|------------------------------|
| <b>cyp51-AT-0</b> | 5'-GGTGGGAGAACTTTCGTTCTA-3'  | Amplification and sequencing |
| <b>cyp51-AT-3</b> | 5'-CTCCATACAAACCACTGACCTC-3' | Sequencing                   |
| <b>cyp51-AT-4</b> | 5'-ACGGCAGCATGAAGTTGAT-3'    | Sequencing                   |
| <b>cyp51-AT-5</b> | 5'-CGAGTTTGCCGACCTCTAC-3'    | Sequencing                   |
| <b>cyp51-AT-8</b> | 5'-GCCGTTCTTACGCCTTGT-3'     | Amplification and sequencing |

**Supplementary Figure S1.** Results of molecular identification (partial beta-tubulin sequencing)

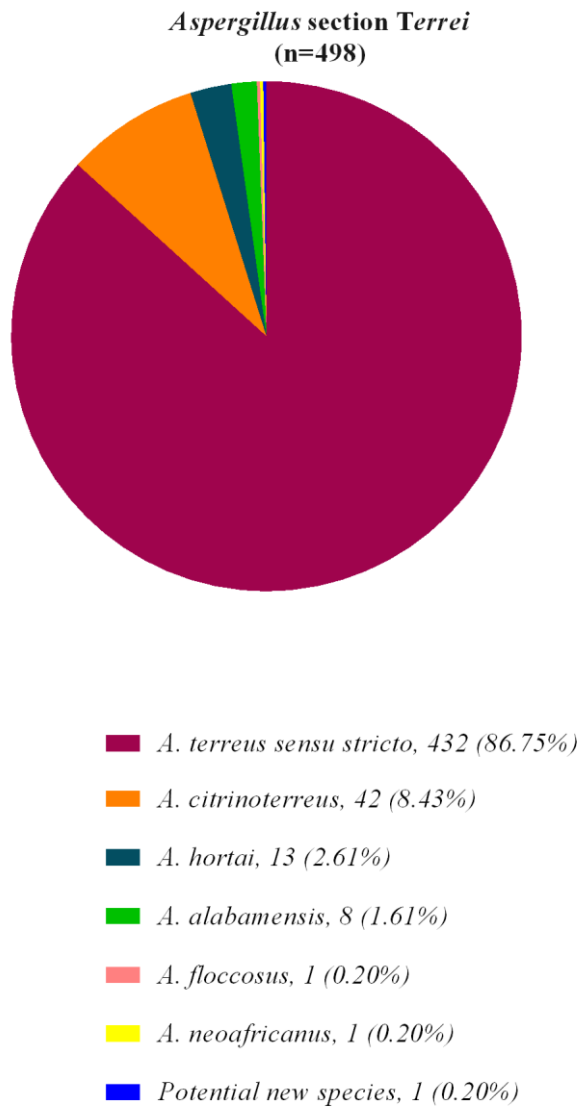

**Supplementary Figure S2 (a-d).** Overview of geographical origin of section *Terrei* isolates per species: a) *A. terreus sensu stricto*, b) *A. citrinoterreus*, c) *A. hortai*, and d) *A. alabamensis*

a)

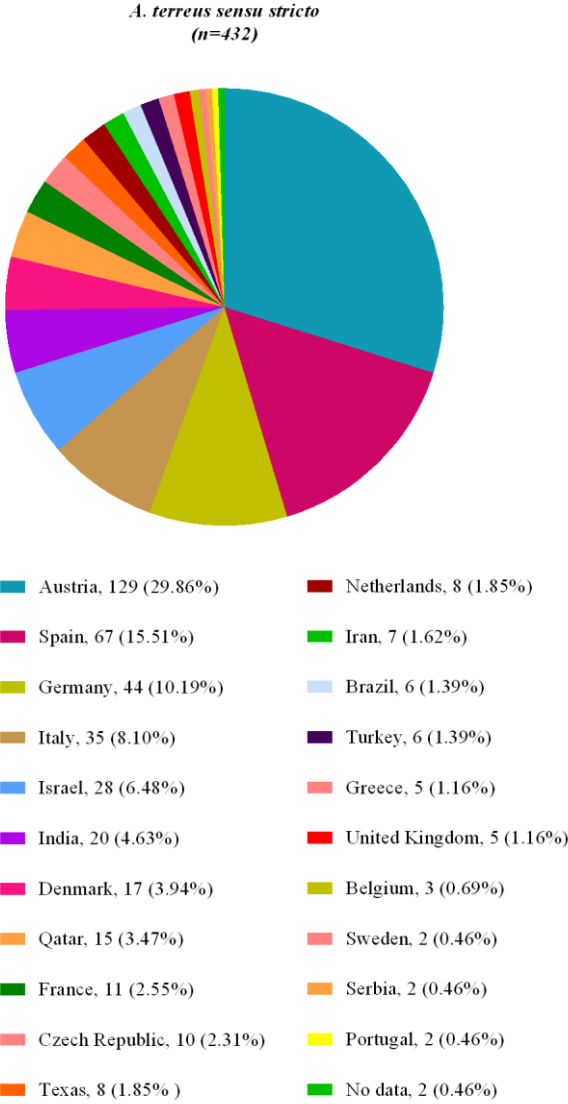

b)

*A. citrinoterreus*  
(n=42)

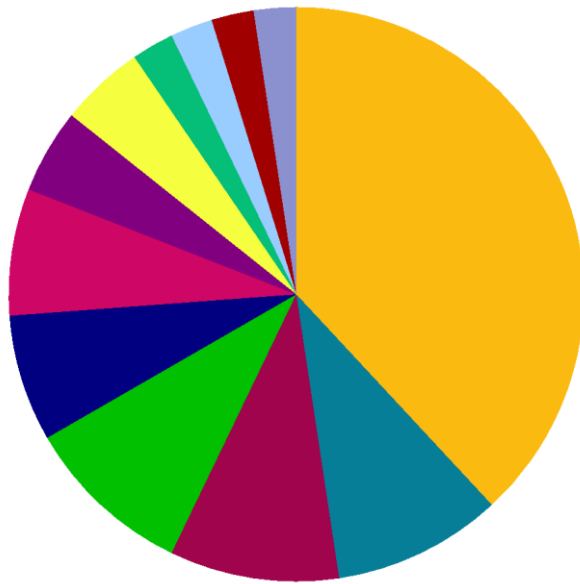

|                           |
|---------------------------|
| Spain, 16 (38.10%)        |
| Germany, 4 (9.52%)        |
| Iran, 4 (9.52%)           |
| Israel, 4 (9.52%)         |
| Austria, 3 (7.14%)        |
| Qatar, 3 (7.14%)          |
| Italy, 2 (4.76%)          |
| United Kingdom, 2 (4.76%) |
| Turkey, 1 (2.38%)         |
| Greece, 1 (2.38%)         |
| Netherlands, 1 (2.38%)    |
| Czech Republic, 1 (2.38%) |



c)

*A. hortai*  
(n=13)

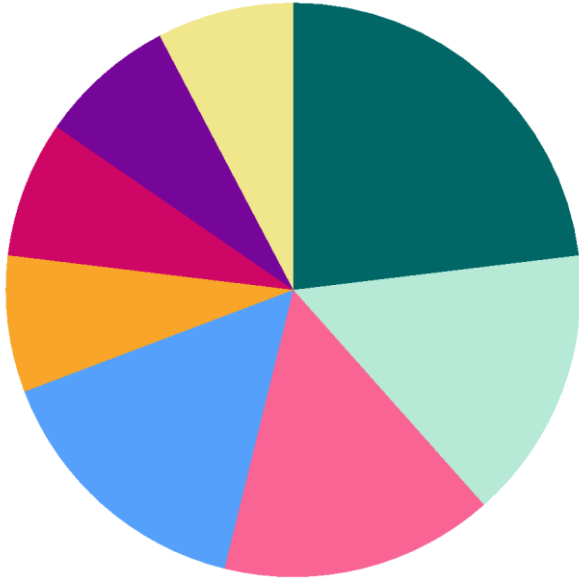

■ Czech Republic, 3 (23.08%)

■ Germany, 2 (15.38%)

■ Italy, 2 (15.38%)

■ Spain, 2 (15.38%)

■ Austria, 1 (7.69%)

■ Brazil, 1 (7.69%)

■ Israel, 1 (7.69%)

■ Texas, 1 (7.69%)

d)

*A. alabamensis*  
(n=8)

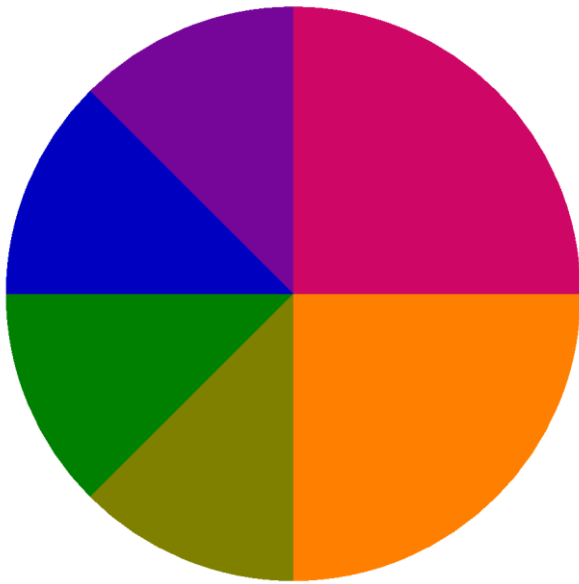

Spain, 2 (25.0%)

Netherlands, 2 (25.0%)

Germany, 1 (12.5%)

Italy, 1 (12.5%)

Texas, 1 (12.5%)

United Kingdom, 1 (12.5%)
